# Supplementary material for: Comparison of Radiography and Computed Tomography for Evaluation of Third Carpal Bone Fractures in Horses
Source: MDPI journal article supplement (doi:10.3390/ani13091459), 2023-04-25
Supplement: s1 [file s1]

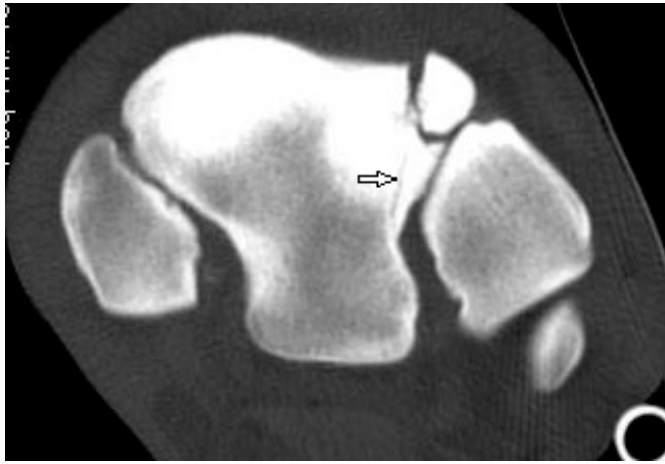

(a)

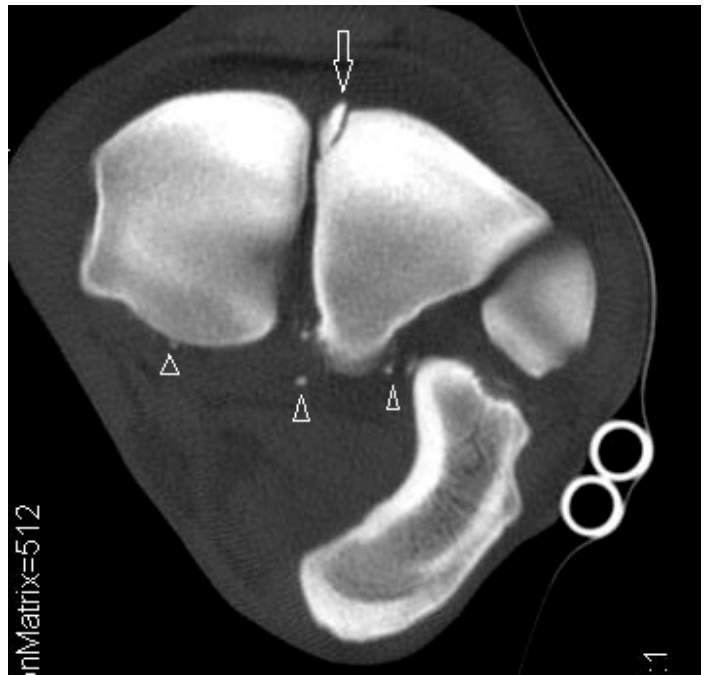

(b)

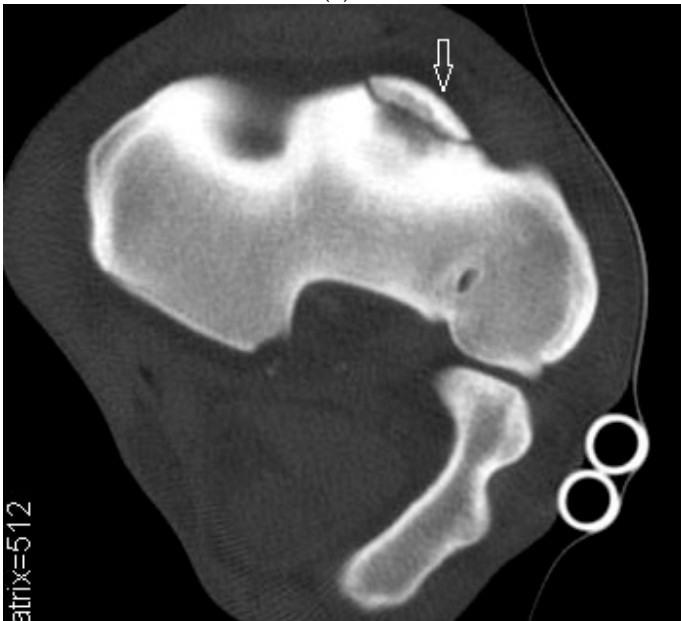

(c)

**Figure S1.** Transverse CT images of the left carpus of a 4 year old Thoroughbred gelding. This horse has a complete displaced corner fracture of the intermediate facet of the left third carpal bone. (a) CT identified additional small comminuted fragments within the fracture at the proximal articular surface, and a large fissure extending in a palmar direction (arrow). (b) An osteochondral fragment of the proximal medial corner of the intermediate carpal bone (arrow) and bone debris within the palmar aspect of the joint (arrow heads) is evident. (c) This horse also had an osteochondral fragment with surrounding subchondral bone lysis within the distal radius (arrow).

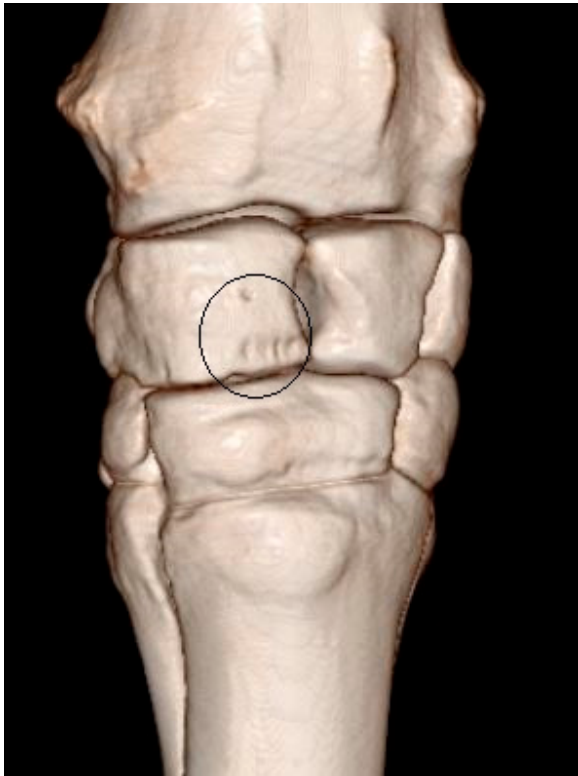

(a)

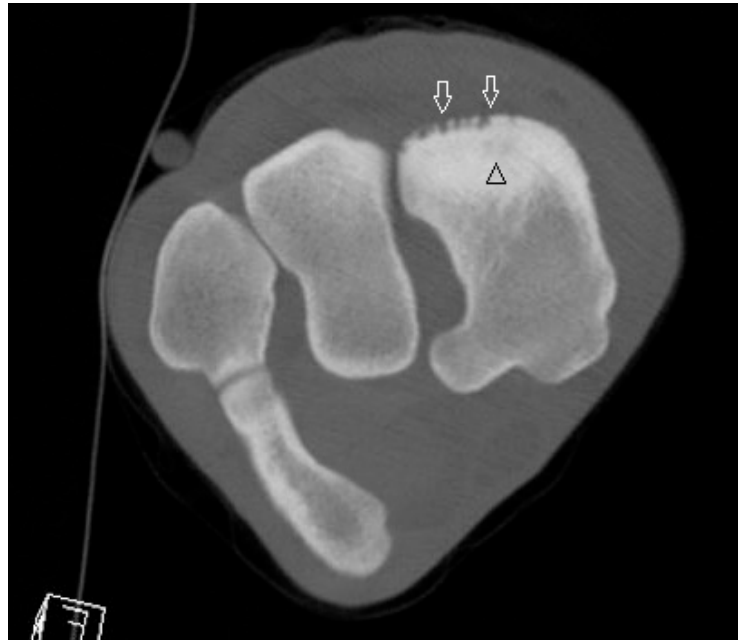

(b)

**Figure S2.** CT images of the left carpus of a 3 year old Thoroughbred colt with an incomplete frontal fracture of the radial facet of the third carpal bone. Concomitant bone lesions to those shown in Figure 2. (a) 3D reconstruction of the carpus showing location of a series of dorsal cortical lucencies (DCL) (circled) within the distal dorsal cortex of the radiocarpal bone (Cr). (b) Transverse CT image of the proximal row of carpal bones at the level of the DCL (arrows) showing a vague lucency (arrow head) that extended from the subchondral bone into the sclerotic medulla. There is marked sclerosis of the dorsal third of the distal Cr. .

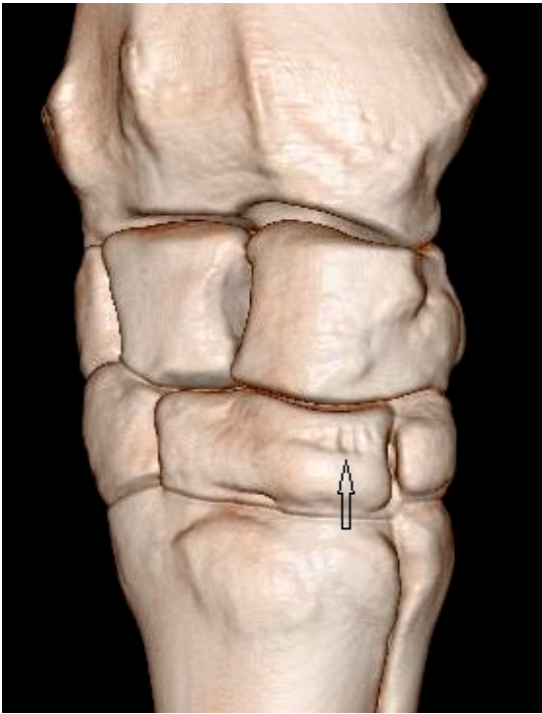

(a)

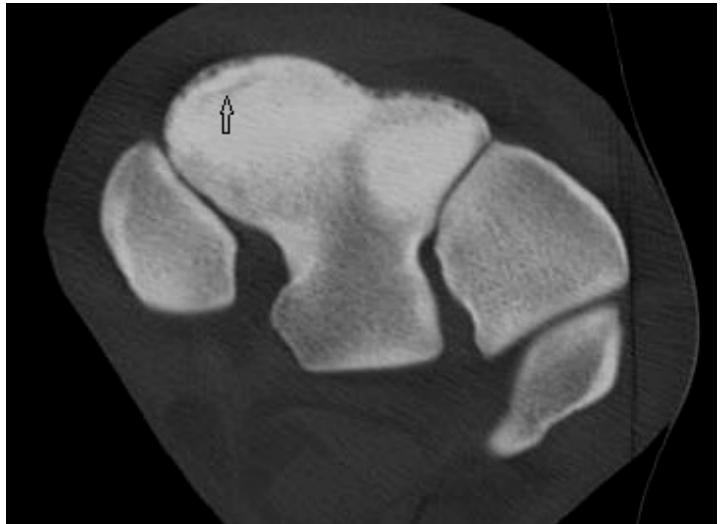

(b)

**Figure S3.** CT images of the right carpus of a 5 year old male Thoroughbred with an incomplete frontal fracture. (a) 3D reconstruction of the carpus showing location of a series of dorsal cortical lucencies (DCL) (arrow) within the proximal medial aspect of the third carpal bone (C3). (b) Transverse CT image of the distal row of carpal bones at the level just distal to the proximal subchondral bone showing an incomplete frontal fracture (arrow) and multiple small DCL within the dorsal cortex of C3. There is marked sclerosis of the proximal third of the radial and intermediate facet of C3. .

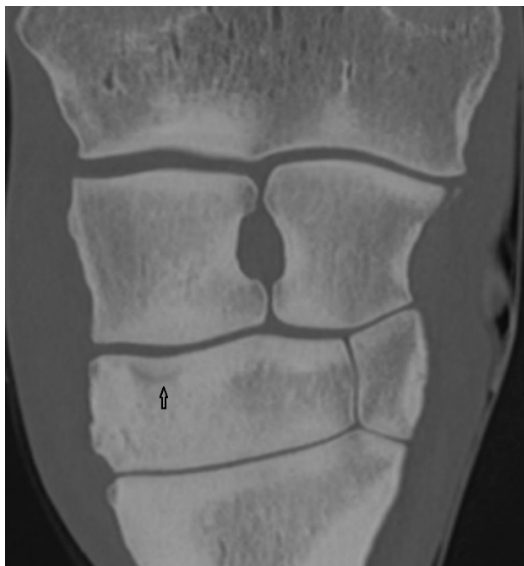

(a)

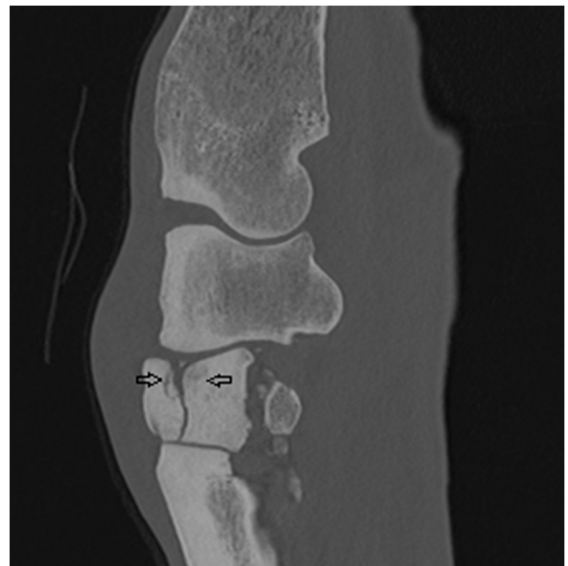

(b)

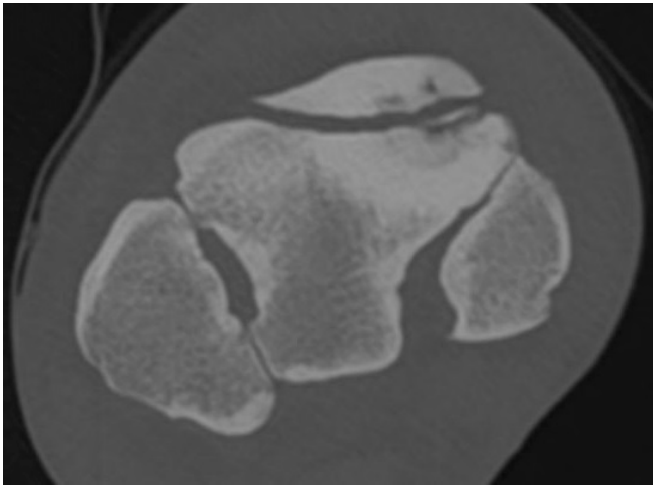

(c)

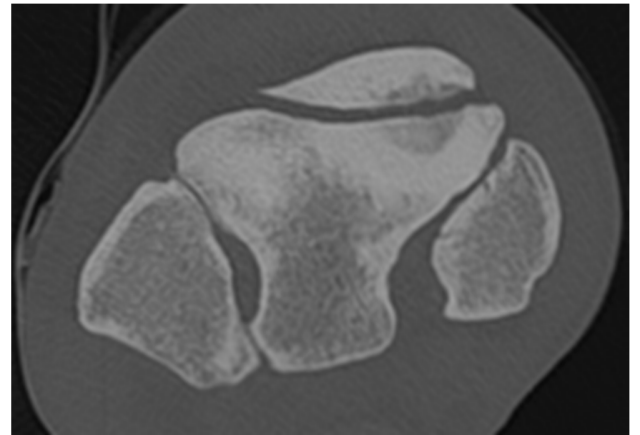

(d)

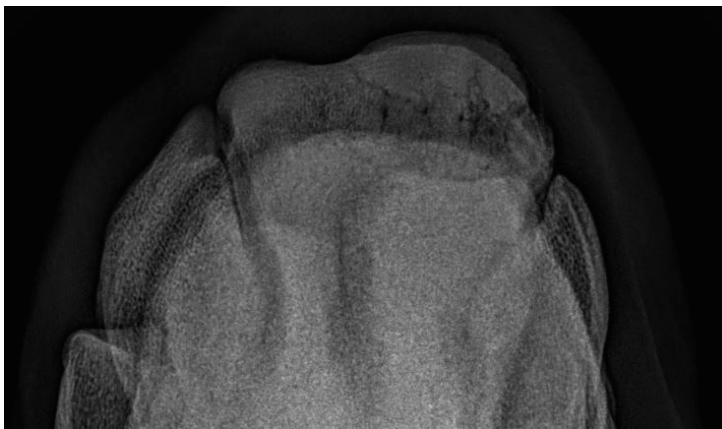

(e)

**Figure S4.** Images of the left carpus of a 3 year old Thoroughbred filly with a complete frontal slab fracture of the third carpal bone (C3). (a) Dorsal CT image immediately palmar to the fracture showing a crescent shaped radiolucency within the radial facet (RaF) of C3 (arrow). (b) Sagittal CT image through the mid radial facet of C3 showing the complete frontal fracture and surrounding radiolucencies (arrows). There is a V-shaped area of bone loss at the proximal articular surface, and a small fragment within this 'trough'. (c) Transverse CT image of the most proximal aspect of the distal row of carpal bones showing the complete, displaced frontal slab fracture of the RaF and medial aspect of the intermediate facet and a fragment within the fracture at the medial aspect of the RaF. The RaF is sclerotic and there are areas of sclerosis surrounding the fracture. (d) The extent of lysis within the RaF is evident on this transverse CT image slightly more distad. (e) Flexed dorsoproximal-dorsodistal oblique radiographic view of the left distal row of carpal bones showing the frontal slab fracture and areas of lucency within the RaF.

**Table S1:** Agreement between CT and digital radiography of one or both carpi for 26 horses with third carpal bone fractures. N=number of carpi used for calculation, C3=third carpal bone, Fx=fracture, NC=Not calculable as there were no observations.

| Parameter                                                                  | N  | Kappa (SE)    | Interpretation |
|----------------------------------------------------------------------------|----|---------------|----------------|
| C3 sagittal fracture                                                       | 38 | 0.90 (0.09)   | Almost perfect |
| C3 frontal fracture                                                        | 38 | 0.74 (0.10)   | Substantial    |
| C3 fracture other configuration                                            | 38 | 0.54 (0.20)   | Moderate       |
| C3 Fx Radial facet only                                                    | 38 | 0.68 (0.12)   | Substantial    |
| C3 Fx Intermediate facet only                                              | 38 | 1.0 (0)       | Almost perfect |
| C3 Fx Both facets                                                          | 38 | 0.54 (0.18)   | Moderate       |
| C3 Fx incomplete sagittal plane cranial not caudal                         | 38 | -0.07 (0.033) | Poor           |
| C3 Fx incomplete sagittal plane caudal not cranial                         | 38 | NC            |                |
| C3 Fx incomplete frontal plane medial not lateral                          | 38 | 0 (0)         | Slight         |
| C3 Fx incomplete frontal plane lateral not medial                          | 38 | -0.07 (0.04)  | Poor           |
| C3 Fx incomplete proximal to distal - proximal not distal                  | 38 | 0.13 (0.16)   | Slight         |
| C3 Fx incomplete proximal to distal - distal not proximal                  | 38 | NC            |                |
| C3 Fx complete sagittal plane                                              | 38 | 0 (0)         | Slight         |
| C3 Fx complete frontal plane                                               | 38 | 0.72 (0.11)   | Substantial    |
| C3 Fx complete proximal to distal                                          | 38 | 0.51 (0.13)   | Moderate       |
| C3 Fx comminuted nil (Simple)                                              | 38 | 0.49 (0.15)   | Moderate       |
| C3 Fx Comminuted mild                                                      | 38 | 0.32 (0.18)   | Fair           |
| C3 Fx Comminuted moderate                                                  | 38 | 0.72 (0.19)   | Substantial    |
| C3 Fx Comminuted severe                                                    | 38 | NC            |                |
| Displacement of main C3 bone fragment                                      | 37 | 0.80 (0.11)   | Substantial    |
| Main C3 fragment mildly displaced (<5 mm)                                  | 37 | 0.84 (0.11)   | Almost perfect |
| Main C3 fragment moderately displaced (5-10 mm)                            | 37 | 0.79 (0.21)   | Substantial    |
| Main C3 fragment severely displaced (>10 mm)                               | 37 | NC            |                |
| C3 Fx fissure lines (perpendicular to main fracture line)                  | 38 | 0.79 (0.21)   | Substantial    |
| Bone loss ('trough') at fracture site present                              | 38 | 0.46 (0.12)   | Moderate       |
| Bone loss ('trough') at fracture site small (<5 mm)                        | 38 | -0.09 (0.05)  | Poor           |
| Bone loss ('trough') at fracture site medium (5-10 mm)                     | 38 | 0.35 (0.20)   | Fair           |
| Bone loss ('trough') at fracture site large (>10 mm)                       | 38 | -0.04 (0.03)  | Poor           |
| Fragment(s) present in proximal fracture line 'trough'                     | 38 | 0.31 (0.16)   | Fair           |
| Focal lysis in proximal subchondral bone plate remote from Fx line present | 38 | 0.30 (0.24)   | Fair           |
| Focal lysis in proximal subchondral bone plate remote from Fx line small   | 38 | 0 (0)         | Slight         |
| Focal lysis in proximal subchondral bone plate remote from Fx line medium  | 38 | 1.0 (0)       | Almost perfect |
| Focal lysis in proximal subchondral bone plate remote from Fx line large   | 38 | NC            |                |
| C3 bone fragment remote from fracture site                                 | 38 | 0 (0)         | Slight         |
| C3 Sclerosis transverse plane mild                                         | 38 | 0.14 (0.13)   | Slight         |
| C3 Sclerosis transverse plane moderate                                     | 38 | 0.26 (0.15)   | Fair           |
| C3 Sclerosis transverse plane severe                                       | 38 | -0.03 (0.10)  | Poor           |
| C3 Dorsal Cortical Lucencies (DCL)                                         | 36 | 0.51 (0.15)   | Moderate       |
| C3 Lucency other than DCL and Fx line                                      | 36 | 0.30 (0.13)   | Fair           |
| Lesions in palmar carpus (bone debris or fragments)                        | 38 | 0.87 (0.12)   | Almost perfect |
| Lesions second carpal bone (C2)                                            | 38 | 0 (0)         | Slight         |
| Lesions fourth carpal bone (C4)                                            | 38 | 1.0 (0)       | Almost perfect |
| Lesions radial carpal bone (Cr)                                            | 38 | 0 (0)         | Slight         |

|                                                                        |    |              |                |
|------------------------------------------------------------------------|----|--------------|----------------|
| Lesions intermediate carpal bone (Ci)                                  | 38 | 0.25 (0.14)  | Fair           |
| Lesions ulnar carpal bone (Cu)                                         | 38 | 0.08 (0.18)  | Slight         |
| Lesions distal radius (diRd)                                           | 38 | 0.20 (0.12)  | Slight         |
| Soft tissue swelling                                                   | 36 | 0.71 (0.12)  | Substantial    |
| Osseous fragment(s) (OF) other carpal bone                             | 36 | 0.34 (0.14)  | Fair           |
| Slab fracture other carpal bone                                        | 36 | 1.0 (0)      | Almost perfect |
| Dorsal cortex modelling or enthesiophyte new bone other carpal bone(s) | 36 | 0.43 (0.14)  | Moderate       |
| Radial carpal bone (Cr) sclerosis                                      | 36 | 0.11 (0.10)  | Slight         |
| Radial carpal bone (Cr) sclerosis without other Cr lesions             | 36 | 0.36 (0.17)  | Fair           |
| Radial carpal bone (Cr) sclerosis with other Cr lesion(s)              | 38 | 0.59 (0.14)  | Moderate       |
| Intermediate carpal bone (Ci) sclerosis                                | 36 | -0.24 (0.13) | Poor           |
| Intermediate carpal bone (Ci) sclerosis without other Ci lesions       | 36 | 0.08 (0.19)  | Slight         |
| Intermediate carpal bone sclerosis (Ci) with other Ci lesion(s)        | 36 | 0.30 (0.17)  | Fair           |
| Distal radius (diRd) sclerosis                                         | 36 | -0.07 (0.09) | Poor           |
| Distal radius sclerosis without other diRd lesions                     | 36 | 0 (0)        | Slight         |
| Distal radius sclerosis with other diRd lesions                        | 36 | 0.32 (0.17)  | Fair           |
| Dorsal cortex lucencies other carpal bones                             | 36 | 0.24 (0.16)  | Fair           |
| Focal subchondral bone lysis other carpal bone                         | 36 | 0.07 (0.12)  | Slight         |
| Vertical lucency/incomplete fracture other carpal bone                 | 36 | -0.04 (0.03) | Poor           |

**Table S2.** Third carpal bone fracture characteristics and other findings based on CT and gross post-mortem dissection and comparison to conventional film radiography (XR) in 15 Thoroughbred racehorses with third carpal bone slab fracture. M=male, MC=male castrate, F=female, Fx=fracture, L=left, R=right, C3=third carpal bone, C2=second carpal bone, C4=fourth carpal bone, Cr=radiocarpal bone, Ci=intermediate carpal bone, SCBL=subchondral bone lucency that might extend into trabecular bone, DCL=dorsal cortical lucency, RaF=radial facet, InF=intermediate facet, FT=full thickness, CT=computed tomography, XR=conventional radiography, OF=osseous fragment, med=medial, prox=proximal, compl=complete, POD=palmar osteochondral disease.

| Signalment | Fx Limb | Diagnosis based on CT and gross dissection                                                                                   | Lesions identified on CT compared to conventional film radiography (XR)                                                                                       |
|------------|---------|------------------------------------------------------------------------------------------------------------------------------|---------------------------------------------------------------------------------------------------------------------------------------------------------------|
| 3 y, M     | L       | Incompl frontal Fx C3                                                                                                        | Incompl frontal Fx, fissures and SCBL RaF (FT Pr SCBL 25% width of RaF) identified on CT not XR                                                               |
| 2 y, M     | R and L | R comminuted slab Fx C3 with separate OF med corner C3, C4 Fx; L incompl frontal Fx RaF                                      | XR underestimated extent of R C3 comminution and failed to detect incompl Fx L C3                                                                             |
| 4 y, M     | R and L | R comminuted Slab Fx RaF and large OF InF, L C3 incompl frontal Fx                                                           | XR underestimated extent of comminution R C3 and failed to detect incompl Fx L C3                                                                             |
| 3 y, MC    | L       | Compl frontal slab Fx RaF C3                                                                                                 | CT identified large 'trough' bone loss at prox articular surface                                                                                              |
| 4 y, MC    | L       | Large corner Fx InF C3                                                                                                       | CT clarified large corner Fx rather than a sagittal Fx, additional large fissure extending in palmar direction, minor comminution at joint surface, and Ci OF |
| 4 y, MC    | R       | Compl frontal slab Fx RaF with comminution                                                                                   | CT identified mild prox comminution, additional fissure extending to palmar cortex in prox third of C3, and SCBL RaF in both carpi                            |
| 5 y, MC    | L       | Comminuted slab Fx RaF and InF, OF Ci and Cr                                                                                 | Extent of comminution C3 and SCBL Cr detected on CT                                                                                                           |
| 5 y, MC    | R       | Compl frontal slab Fx RaF C3 with additional comminution                                                                     | Extent of Fx, bone loss and identification of fissure extending in palmar direction. Difficult to obtain good skyline XR due to carpal pain                   |
| 4 y, F     | R       | Compl frontal slab Fx RaF C3 with additional comminution                                                                     | Extent of bone loss and OF in Fx 'trough' and possible fissure lines in palmar direction detected on CT                                                       |
| 5 y, MC    | L       | Compl frontal slab RaF Fx C3 with mild comminution, SCBL distal Ci, OF prox Ci, DCL Cr                                       | Minor additional comminution C3, wide prox bone loss RaF and lesions Cr and Cr detected on CT                                                                 |
| 4 y, MC    | L       | Compl nondisplaced frontal slab Fx RaF C3 with focal SCBL InF                                                                | CT confirmed slab Fx is complete (appeared incomplete on XR), saucer-shaped SCBL InF, vertical lucencies Cr                                                   |
| 6 y, MC    | L       | Large compl non-displaced corner Fx RaF C3                                                                                   | CT confirmed C3 Fx is complete (unsure on XR) and revealed extent of Cr lesions (SCBL and vertical trabecular lucency, OF and dorsal cortical new bone)       |
| 7 y, MC    | R       | Compl frontal slab Fx RaF C3                                                                                                 | Wide prox bone loss RaF, DCLs, lesions Cr and Ci detected on CT                                                                                               |
| 3 y, MC    | R       | Compl displaced comminuted slab Fx RaF and InF, C2 slab Fx, small SCBL RaF other carpus                                      | CT identified extent of comminution C3, confirming configuration of C2 Fx, trabecular lucency C3, vertical lucencies RaF other carpus                         |
| 5 y, MC    | R       | Incompl frontal Fx RaF C3 with saucer-shaped lucency RaF and InF ('POD-like' lesion) both carpi, large OFs diCr other carpus | CT confirmed Fx is incompl and identified saucer-shaped ('POD-like') lesion within prox SCB RaF, lytic defect within distal SCB InF                           |





|    |                                                                                                                                                                                                                                                                                                                                                   |   |    |                     |     |                   |           |        |    |            |               |             |                          |                                     |
|----|---------------------------------------------------------------------------------------------------------------------------------------------------------------------------------------------------------------------------------------------------------------------------------------------------------------------------------------------------|---|----|---------------------|-----|-------------------|-----------|--------|----|------------|---------------|-------------|--------------------------|-------------------------------------|
| 8  | F, 4 y, TB                                                                                                                                                                                                                                                                                                                                        | R | Fr | Complete, uni-art   | RaF | No                | RaF*, Cr* | Small  | 0  | C3         | Rd*           | Ci, Rd      | Cr x 2 (di med, di lat*) |                                     |
|    | <b>Comments:</b> CT identified sagittal fissure RaF, a second diCr OF, vertical lucency extending into trabecular bone Cr, modelling and DCL Rd all not seen on DR.<br><b>CT contralateral carpus:</b> (CT but no DR). Focal SCBL InF, sclerosis and fissures Cr.                                                                                 |   |    |                     |     |                   |           |        |    |            |               |             |                          |                                     |
| 9  | G, 5 y, TB                                                                                                                                                                                                                                                                                                                                        | R | Fr | Complete, uni-art   | RaF | Mod               | Unsure    | Medium | 0  | C3         | Cr*, Ci*, Rd* | Cr          | Rd (incompl)*            | InF (pr)*, InF (di)* and proxMCIII* |
|    | <b>Comments:</b> Multiple SCBL, many only evident on CT, incomplete OF Rd evident on CT.<br><b>CT contralateral carpus (lesions other than sclerosis):</b> DCL RaF, Cr, Ci, Rd with incompl OF Rd*, SCBL prox + di InF*, prox MCIII* and prox RaF*, OF C3.                                                                                        |   |    |                     |     |                   |           |        |    |            |               |             |                          |                                     |
| 10 | G, 3 y, TB                                                                                                                                                                                                                                                                                                                                        | L | Fr | Incompl             | RaF | No (unsure on DR) | No        | No     | 0  | C3         | Cr*, Ci*      |             | Cr (di)?                 | InF (di)*                           |
|    | <b>Other:</b> POD-like lesion RaF, small palmar axial OF Cu.<br><b>Comments:</b> Extent of incomplete Fx evident on CT.<br><b>CT contralateral carpus (lesions other than sclerosis):</b> Subtle SCBL prCi                                                                                                                                        |   |    |                     |     |                   |           |        |    |            |               |             |                          |                                     |
| 11 | M, 5 y, TB                                                                                                                                                                                                                                                                                                                                        | R | Fr | Incompl             | RaF | No                | No        | No     | 0  | C3         | C3            |             |                          |                                     |
|    | <b>Comments:</b> No bone lesions in other carpal bones other than sclerosis.<br><b>CT contralateral carpus:</b> Mild Sclerosis C3 is only finding.                                                                                                                                                                                                |   |    |                     |     |                   |           |        |    |            |               |             |                          |                                     |
| 12 | M, 3 y, TB                                                                                                                                                                                                                                                                                                                                        | L | Fr | Incompl*            | RaF | No                | No        | No     | 0  | C3         | Cr            | Cr          |                          | Cr (di)                             |
|    | <b>Other:</b> Small incompl Fx/vertical lucency extending into trabecular bone Cr*, Possible OA C2-C3 joint.<br><b>Comments:</b> Marked sclerosis, DCL and SCBL Cr.<br><b>CT contralateral carpus:</b> CT only (no DR). Sclerosis C3, DCL Cr and Rd.                                                                                              |   |    |                     |     |                   |           |        |    |            |               |             |                          |                                     |
| 13 | F, 4 y, TB                                                                                                                                                                                                                                                                                                                                        | L | Fr | Complete            | RaF | Mild              | Unsure    | No     | 0  | C3         | C3            | Cr (di OP)* |                          | C3 (RaF prox)                       |
|    | <b>Other:</b> Small OF Cu*<br><b>Comments:</b> Minimal changes other carpal bones.<br><b>CT contralateral carpus (lesions other than sclerosis):</b> Vertical lucencies within trabecular bone and DCL RaF, OA at articulation C2-C3*, multiple small OCLL C2 and MCII, Fx pr MCIII, SCBL and OP Cr.                                              |   |    |                     |     |                   |           |        |    |            |               |             |                          |                                     |
| 14 | G, 3 y, TB                                                                                                                                                                                                                                                                                                                                        | R | Sa | Incompl?            | RaF | No                | Unsure    | Small  | 0  | C3         | Cr*           | Cr          |                          | Cr*                                 |
|    | <b>Other:</b> OCLL distal Rd, separate POD-like SCBL RaF, SCBL or small OCLL distal Rd, small OCF palmar axial Cu.<br><b>Comments:</b> Unsure whether Fx complete or incomplete on CT.<br><b>CT contralateral carpus:</b> CT only (no DR). Severe sclerosis RaF, subtle SCBL mid RaF, minor OP diCr, mild modelling and mild DCL Cr, sclerosis Rd |   |    |                     |     |                   |           |        |    |            |               |             |                          |                                     |
| 15 | G, 5 y, TB                                                                                                                                                                                                                                                                                                                                        | R | Fr | Complete, uni-artic | RaF | Mild (unsure)     | No        | Small  | 1* | C3, Cr, Ci | Cr*           |             |                          | InF (pr)*, Ci (di)*, Cr (pr)*       |

|    |                                                                                                                                                                                                                                  |   |       |                     |         |       |     |       |        |                |  |            |                     |                     |  |
|----|----------------------------------------------------------------------------------------------------------------------------------------------------------------------------------------------------------------------------------|---|-------|---------------------|---------|-------|-----|-------|--------|----------------|--|------------|---------------------|---------------------|--|
|    | <b>Comments:</b> SCBL prox InF and 'kissing' SCBL diCi, palmar debris, sclerosis C3, Cr, Ci, DCL Cr. CT detected SCBL InF (bilat) and Ci (bilat) and confirmed OF Cr and Ci within other carpus where only lysis was seen on DR. |   |       |                     |         |       |     |       |        |                |  |            |                     |                     |  |
|    | <b>CT contralateral carpus:</b> OF InF C3, SCBL RaF (?), new bone and DCL RaF*, SCBL diCr, OF and SCBL Ci*, DCL and sclerosis Rd*.                                                                                               |   |       |                     |         |       |     |       |        |                |  |            |                     |                     |  |
| 16 | G, 5 y, TB                                                                                                                                                                                                                       | R | Fr    | Complete            | InF     | No    | No  | No    | 0      | C3, Cr, Ci     |  |            |                     |                     |  |
|    | <b>Comments:</b> Minimal bone changes in other carpal bones other than some sclerosis.                                                                                                                                           |   |       |                     |         |       |     |       |        |                |  |            |                     |                     |  |
|    | <b>CT contralateral carpus:</b> Moderate sclerosis C3, minor DCL RaF.                                                                                                                                                            |   |       |                     |         |       |     |       |        |                |  |            |                     |                     |  |
| 17 | G, 5 y, TB                                                                                                                                                                                                                       | L | Fr    | Complete            | RaF     | Mild  | Yes | Small | 1      | C3             |  |            | Cr (di)*            |                     |  |
|    | <b>CT contralateral carpus (lesions other than sclerosis):</b> Incompl Fr Fx RaF, DCL RaF, DCL and enthesal new bone Cr.                                                                                                         |   |       |                     |         |       |     |       |        |                |  |            |                     |                     |  |
| 18 | F, 3 y, TB                                                                                                                                                                                                                       | R | Fr    | Complete            | RaF+InF | Mild  | No  | Small | 1*     | C3             |  | Cr (OP di) | Cr*, Cu (pa x 2)    | Cr (di)*            |  |
|    | <b>CT contralateral carpus:</b> Not available                                                                                                                                                                                    |   |       |                     |         |       |     |       |        |                |  |            |                     |                     |  |
| 19 | F, 3 y, SB                                                                                                                                                                                                                       | R | Sa+Fr | Complete            | RaF+InF | Mild* | No  | Small | 0      | C3             |  |            |                     |                     |  |
|    | <b>Comments:</b> CT valuable for determining Fx configuration (as Fx extends palmar to InF) and to confirm Fx is complete.                                                                                                       |   |       |                     |         |       |     |       |        |                |  |            |                     |                     |  |
|    | <b>CT contralateral carpus:</b> Not available                                                                                                                                                                                    |   |       |                     |         |       |     |       |        |                |  |            |                     |                     |  |
| 20 | M, 1 y, TB                                                                                                                                                                                                                       | L | Sa+Fr | Complete, uni-artic | RaF     | No    | No  | No    | 0      | C3             |  | Cr (OP di) |                     |                     |  |
|    | <b>CT contralateral carpus:</b> Not available                                                                                                                                                                                    |   |       |                     |         |       |     |       |        |                |  |            |                     |                     |  |
| 21 | F, 2 y, SB                                                                                                                                                                                                                       | R | Fr    | Complete            | RaF+InF | Mild  | No  | Med   | Unsure | C3             |  |            |                     | Cr (di, mid facet)* |  |
|    | <b>Comments:</b> 'Kissing' lesion SCBL Cr, early OF or DCL Rd?*                                                                                                                                                                  |   |       |                     |         |       |     |       |        |                |  |            |                     |                     |  |
|    | <b>CT contralateral carpus (lesions other than sclerosis):</b> 'POD-like' lucency RaF.                                                                                                                                           |   |       |                     |         |       |     |       |        |                |  |            |                     |                     |  |
| 22 | G, 3 y, TB                                                                                                                                                                                                                       | L | Sa    | Complete            | RaF     | No    | No  | No    | 0      | C3             |  |            |                     |                     |  |
|    | <b>CT contralateral carpus (lesions other than sclerosis):</b> Not available                                                                                                                                                     |   |       |                     |         |       |     |       |        |                |  |            |                     |                     |  |
| 23 | G, 6 y, TB                                                                                                                                                                                                                       | L | Sa+Fr | Complete, uni-artic | RaF     | Mod*  | Yes | Med   | 0      | C3             |  | Cr , C3    | Cr (di), Ci(d)      | Ci (di)             |  |
|    | <b>Comments:</b> Large frontal fissure RaF*, SCBL InF at C4 articulation, multiple OF Cr, Ci, enthesal new bone Cr.                                                                                                              |   |       |                     |         |       |     |       |        |                |  |            |                     |                     |  |
|    | <b>CT contralateral carpus (lesions other than sclerosis):</b> Multiple OF diCr, OCF diCi, enthesal new bone Cr.                                                                                                                 |   |       |                     |         |       |     |       |        |                |  |            |                     |                     |  |
| 24 | G, 4 y, TB                                                                                                                                                                                                                       | L | Fr    | Complete            | RaF     | Mod*  | No  | No    | 0      | C3             |  | Cr, Ci     |                     |                     |  |
|    | <b>CT contralateral carpus:</b> Sclerosis and enthesal new bone Cr*, Ci sclerosis*.                                                                                                                                              |   |       |                     |         |       |     |       |        |                |  |            |                     |                     |  |
| 25 | F, 2 y, TB                                                                                                                                                                                                                       | L | Sa    | Incompl             | RaF     | No    | No  | Small | 0      | C3             |  | Cr         | Cr (di)             |                     |  |
|    | <b>CT contralateral carpus:</b> Not available but also had SCBL C3 debrided during arthroscopy.                                                                                                                                  |   |       |                     |         |       |     |       |        |                |  |            |                     |                     |  |
| 26 | F, 3 y, TB                                                                                                                                                                                                                       | L | Fr    | Complete            | RaF+InF | Mild* | No  | Large | 0      | C3, Cr, Ci, Rd |  |            | Rd (small incompl)* | C3 (Large Raf)      |  |
|    | <b>Comments:</b> Large SCBL central RaF underestimated on DR.                                                                                                                                                                    |   |       |                     |         |       |     |       |        |                |  |            |                     |                     |  |
|    | <b>CT contralateral carpus:</b> Sclerosis C3, Cr and Ci, and subtle vertical lucencies extending into trabecular bone mid RaF*.                                                                                                  |   |       |                     |         |       |     |       |        |                |  |            |                     |                     |  |
